# Supplementary material for: Opportunistic screening for atrial fibrillation with a single lead device in geriatric patients
Source: PubMed Central journal article supplement — J Geriatr Cardiol. 2020 Mar;17(3):149–54. doi: 10.11909/j.issn.1671-5411.2020.03.007 (PMC7118016; doi:10.11909/j.issn.1671-5411.2020.03.007), 2020-03
Supplement: jgc-17-03-149-s001.pdf [file jgc-17-03-149-s001.pdf]

## Appendices

**Supplementary Table 1. Detailed list of use of medication.**

|                                                 | <b>Total (n = 439)</b> | <b>SR (n = 326)</b> | <b>AF (n = 113)</b> | <b>P</b> |
|-------------------------------------------------|------------------------|---------------------|---------------------|----------|
| ACE or ARB, <i>n</i> (%)                        | 174 (39.6)             | 121 (37.1)          | 53 (46.9)           | 0.067    |
| Beta blocker, <i>n</i> (%)                      | 157 (35.8)             | 91 (27.9)           | 66 (58.4)           | < 0.001  |
| Anti platelet agent, <i>n</i> (%)               | 115 (26.2)             | 100 (30.7)          | 15 (13.3)           | < 0.001  |
| Vitamin K antagonist, <i>n</i> (%)              | 65 (14.8)              | 7 (2.1)             | 58 (51.3)           | < 0.001  |
| NOAC, <i>n</i> (%)                              | 23 (5.2)               | 1 (0.3)             | 22 (19.5)           | < 0.001  |
| Loop diuretics, <i>n</i> (%)                    | 39 (8.9)               | 15 (4.6)            | 24 (21.2)           | < 0.001  |
| Thiazide diuretics, <i>n</i> (%)                | 57 (13.0)              | 48 (14.7)           | 9 (8.0)             | 0.065    |
| Potassium retaining diuretics, <i>n</i> (%)     | 20 (4.6)               | 9 (2.8)             | 11 (9.7)            | 0.002    |
| Lipid lowering drugs, <i>n</i> (%)              | 181 (41.2)             | 129 (39.6)          | 52 (46.0)           | 0.230    |
| NSAID, cox, not APA, <i>n</i> (%)               | 29 (6.6)               | 23 (7.1)            | 6 (5.3)             | 0.520    |
| Dihydropyridines, <i>n</i> (%)                  | 86 (19.6)              | 56 (17.2)           | 30 (26.5)           | 0.031    |
| Anti arithmetic, not Beta blocker, <i>n</i> (%) | 20 (4.6)               | 2 (0.6)             | 18 (15.9)           | < 0.001  |
| Nitrate, <i>n</i> (%)                           | 35 (8.0)               | 21 (6.4)            | 14 (12.4)           | 0.044    |
| Paracetamol, <i>n</i> (%)                       | 61 (13.9)              | 47 (14.4)           | 14 (12.4)           | 0.591    |
| Opioids, <i>n</i> (%)                           | 37 (8.4)               | 27 (8.3)            | 10 (8.8)            | 0.852    |
| Benzodiazepines, <i>n</i> (%)                   | 72 (16.4)              | 60 (18.4)           | 12 (10.6)           | 0.054    |
| Alpha blocker, <i>n</i> (%)                     | 22 (5.0)               | 14 (4.3)            | 8 (7.1)             | 0.242    |
| 5 alpha reductase antagonist, <i>n</i> (%)      | 13 (3.0)               | 9 (2.8)             | 4 (3.5)             | 0.674    |
| Spasmolytics, <i>n</i> (%)                      | 18 (4.1)               | 11 (3.4)            | 7 (6.2)             | 0.193    |
| Anti depressants, <i>n</i> (%)                  | 56 (12.8)              | 44 (13.5)           | 12 (10.6)           | 0.429    |
| Anti epileptic drugs, <i>n</i> (%)              | 21 (4.8)               | 19 (5.8)            | 2 (1.8)             | 0.082    |
| Parkinson medication, <i>n</i> (%)              | 18 (4.1)               | 14 (4.3)            | 4 (3.5)             | 0.727    |
| Thyroid hormone, <i>n</i> (%)                   | 34 (7.7)               | 21 (6.4)            | 13 (11.5)           | 0.083    |
| Proton pump inhibitor, <i>n</i> (%)             | 189 (43.1)             | 136 (41.7)          | 53 (46.9)           | 0.337    |
| Pulmonary inhaler, <i>n</i> (%)                 | 57 (13.0)              | 42 (12.9)           | 15 (13.3)           | 0.915    |
| Corticosteroids, <i>n</i> (%)                   | 66 (15.0)              | 42 (12.9)           | 24 (21.2)           | 0.032    |
| Vitamin supplements, <i>n</i> (%)               | 222 (50.6)             | 166 (50.9)          | 56 (49.6)           | 0.803    |
| Bisphosphanate, <i>n</i> (%)                    | 49 (11.2)              | 37 (11.3)           | 12 (10.6)           | 0.832    |
| Metformin, <i>n</i> (%)                         | 56 (12.8)              | 41 (12.6)           | 15 (13.3)           | 0.848    |
| SU derivatives, <i>n</i> (%)                    | 24 (5.5)               | 19 (5.8)            | 5 (4.4)             | 0.572    |
| Insulin, <i>n</i> (%)                           | 23 (5.2)               | 16 (4.9)            | 7 (6.2)             | 0.597    |
| Choline esterase remmer, <i>n</i> (%)           | 12 (2.7)               | 11 (3.4)            | 1 (0.9)             | 0.162    |
| Anti psychotic, <i>n</i> (%)                    | 11 (2.5)               | 5 (1.5)             | 6 (5.3)             | 0.027    |
| Immune suppressant, <i>n</i> (%)                | 13 (3.0)               | 8 (2.5)             | 5 (4.4)             | 0.287    |
| Cancer drug, <i>n</i> (%)                       | 12 (2.7)               | 8 (2.5)             | 4 (3.5)             | 0.542    |
